# Supplementary material for: Bioinformatics-Based Identification of lncRNA-miRNA-mRNA Network in Dilated Cardiomyopathy and Drug Prediction
Source: Hindawi journal article supplement (doi:10.1155/2021/5566316), 2021-03-04
Supplement: f1 [file 5566316.f1.docx]

**Table S1**.

| **EntrezID** | **Gene** |
| --- | --- |
| 9927 | MFN2 |
| 6392 | SDHD |
| 4780 | NFE2L2 |
| 9782 | MATR3 |

EntrezID of mRNA and corresponding gene name.

Tran-target genes of lncRNAs related to oxidative stress responses

| **Tran-target gene** | **Fold change(H2O2/Ctrl)** | **LncRNA** |
| --- | --- | --- |
| GCLM | 2.176010901 | LNCV6_109985_PI430048170 |
| GCLM | 0.355057503 | LNCV6_112571_PI430048170 |
| GCLM | 2.218705943 | LNCV6_118181_PI430048170 |
| GCLM | 0.492162953 | LNCV6_124831_PI430048170 |
| GCLM | 3.621386658 | LNCV6_124844_PI430048170 |
| GCLM | 0.153999626 | LNCV6_24389_PI430048170 |
| GCLM | 0.402366952 | LNCV6_37343_PI430048170 |
| GCLM | 3.500273137 | LNCV6_37521_PI430048170 |
| GCLM | 0.176392817 | LNCV6_43444_PI430048170 |
| GCLM | 4.958227721 | LNCV6_49686_PI430048170 |
| GCLM | 2.888388781 | LNCV6_53303_PI430048170 |
| GCLM | 2.083103937 | LNCV6_53728_PI430048170 |
| GCLM | 4.936714716 | LNCV6_54737_PI430048170 |
| GCLM | 4.736746971 | LNCV6_55110_PI430048170 |
| GCLM | 2.317987964 | LNCV6_55531_PI430048170 |
| GCLM | 2.863228865 | LNCV6_59913_PI430048170 |
| GCLM | 4.02577496 | LNCV6_63508_PI430048170 |
| GCLM | 0.172764847 | LNCV6_63822_PI430048170 |
| GCLM | 2.467300147 | LNCV6_64632_PI430048170 |
| GCLM | 0.21487215 | LNCV6_6592_PI430048170 |
| GCLM | 2.387967646 | LNCV6_66915_PI430048170 |
| GCLM | 0.376166814 | LNCV6_69283_PI430048170 |
| GCLM | 13.49426086 | LNCV6_82543_PI430048170 |
| GCLM | 2.431217109 | LNCV6_83702_PI430048170 |
| GCLM | 0.178137068 | LNCV6_85145_PI430048170 |
| GCLM | 3.602080748 | LNCV6_86817_PI430048170 |
| GCLM | 0.324603588 | LNCV6_88733_PI430048170 |
| GCLM | 2.599644989 | LNCV6_89933_PI430048170 |
| GCLM | 3.275115388 | LNCV6_91167_PI430048170 |
| GCLM | 0.286567352 | LNCV6_50654_PI430048170 |
| FANCC | 0.435014127 | LNCV6_21712_PI430048170 |
| DHFR | 0.405892622 | LNCV6_117346_PI430048170 |
| DHFR | 6.185076134 | LNCV6_121364_PI430048170 |
| SLC7A11 | 6.185076134 | LNCV6_121364_PI430048170 |
| SLC7A11 | 2.205110802 | LNCV6_4182_PI430048170 |
| SLC7A11 | 2.279818972 | LNCV6_4677_PI430048170 |
| SLC7A11 | 0.440286229 | LNCV6_47444_PI430048170 |
| SLC7A11 | 4.936714716 | LNCV6_54737_PI430048170 |
| SLC7A11 | 4.736746971 | LNCV6_55110_PI430048170 |
| SLC7A11 | 3.995393352 | LNCV6_58433_PI430048170 |
| SLC7A11 | 2.718312613 | LNCV6_67761_PI430048170 |
| SLC7A11 | 0.173091195 | LNCV6_82535_PI430048170 |
| GCLC | 0.350132386 | LNCV6_114295_PI430048170 |
| ECT2 | 4.280498219 | LNCV6_102545_PI430048170 |
| ECT2 | 5.164208003 | LNCV6_104048_PI430048170 |
| ECT2 | 3.161458582 | LNCV6_121566_PI430048170 |
| ECT2 | 0.149496419 | LNCV6_122523_PI430048170 |
| ECT2 | 2.081386779 | LNCV6_126384_PI430048170 |
| ECT2 | 0.241647387 | LNCV6_53556_PI430048170 |
| ECT2 | 3.847193762 | LNCV6_53742_PI430048170 |
| ECT2 | 0.456659447 | LNCV6_55372_PI430048170 |
| ECT2 | 0.257258655 | LNCV6_55950_PI430048170 |
| ECT2 | 0.450969467 | LNCV6_65624_PI430048170 |
| ECT2 | 0.347525787 | LNCV6_6953_PI430048170 |
| ECT2 | 0.34469363 | LNCV6_74592_PI430048170 |
| ECT2 | 0.264145786 | LNCV6_76393_PI430048170 |
| ECT2 | 5.949894223 | LNCV6_79054_PI430048170 |
| ECT2 | 0.484878353 | LNCV6_88647_PI430048170 |
| ECT2 | 4.444403131 | LNCV6_89494_PI430048170 |
| ECT2 | 2.599644989 | LNCV6_89933_PI430048170 |
| ECT2 | 8.124792089 | LNCV6_121535_PI430048170 |
| MDM2 | 2.071974126 | LNCV6_107407_PI430048170 |
| MDM2 | 4.894891107 | LNCV6_4328_PI430048170 |
| MDM2 | 2.171769567 | LNCV6_53152_PI430048170 |
| MDM2 | 4.126503417 | LNCV6_57591_PI430048170 |
| MDM2 | 0.400786271 | LNCV6_59648_PI430048170 |
| MDM2 | 3.251162837 | LNCV6_61690_PI430048170 |
| MDM2 | 0.471180891 | LNCV6_62141_PI430048170 |
| MDM2 | 3.121681903 | LNCV6_70178_PI430048170 |
| MDM2 | 0.203164284 | LNCV6_72790_PI430048170 |
| MDM2 | 2.338418626 | LNCV6_73103_PI430048170 |
| MDM2 | 0.170264757 | LNCV6_75546_PI430048170 |
| MDM2 | 6.887788384 | LNCV6_78976_PI430048170 |
| MDM2 | 0.067090499 | LNCV6_80366_PI430048170 |
| MDM2 | 6.968479799 | LNCV6_83272_PI430048170 |
| MDM2 | 2.273939774 | LNCV6_89022_PI430048170 |
| MDM2 | 2.915619896 | LNCV6_95569_PI430048170 |
| MAPK13 | 0.114530057 | LNCV6_101185_PI430048170 |
| MAPK13 | 2.160624628 | LNCV6_107651_PI430048170 |
| MAPK13 | 0.153999626 | LNCV6_24389_PI430048170 |
| MAPK13 | 0.412648878 | LNCV6_37363_PI430048170 |
| MAPK13 | 2.279818972 | LNCV6_4677_PI430048170 |
| MAPK13 | 0.162178199 | LNCV6_53634_PI430048170 |
| MAPK13 | 12.88270504 | LNCV6_53935_PI430048170 |
| MAPK13 | 3.194496464 | LNCV6_61239_PI430048170 |
| MAPK13 | 0.454773488 | LNCV6_62116_PI430048170 |
| MAPK13 | 0.172764847 | LNCV6_63822_PI430048170 |
| MAPK13 | 2.550795577 | LNCV6_68671_PI430048170 |
| MAPK13 | 0.354647633 | LNCV6_78880_PI430048170 |
| MAPK13 | 13.49426086 | LNCV6_82543_PI430048170 |
| MAPK13 | 4.77002229 | LNCV6_83516_PI430048170 |
| MAPK13 | 2.73734527 | LNCV6_84741_PI430048170 |
| MAPK13 | 0.178137068 | LNCV6_85145_PI430048170 |
| MAPK13 | 9.203135245 | LNCV6_90117_PI430048170 |
| MAPK13 | 3.275115388 | LNCV6_91167_PI430048170 |
| MAPK13 | 0.327365646 | LNCV6_94551_PI430048170 |
| MAPK13 | 0.286567352 | LNCV6_50654_PI430048170 |
| NCOA7 | 0.34469363 | LNCV6_74592_PI430048170 |
| CLN8 | 0.401231098 | LNCV6_103812_PI430048170 |
| CLN8 | 5.50517083 | LNCV6_113827_PI430048170 |
| CLN8 | 2.150907677 | LNCV6_122599_PI430048170 |
| CLN8 | 6.987914951 | LNCV6_125162_PI430048170 |
| CLN8 | 0.492537649 | LNCV6_46750_PI430048170 |
| CLN8 | 2.279818972 | LNCV6_4677_PI430048170 |
| CLN8 | 6.65461911 | LNCV6_47866_PI430048170 |
| CLN8 | 4.958227721 | LNCV6_49686_PI430048170 |
| CLN8 | 2.863228865 | LNCV6_59913_PI430048170 |
| CLN8 | 2.387967646 | LNCV6_66915_PI430048170 |
| CLN8 | 2.13063097 | LNCV6_72494_PI430048170 |
| CLN8 | 2.73734527 | LNCV6_84741_PI430048170 |
| CLN8 | 0.333780493 | LNCV6_85819_PI430048170 |
| CLN8 | 0.152628977 | LNCV6_86588_PI430048170 |
| CLN8 | 9.203135245 | LNCV6_90117_PI430048170 |
| NOX4 | 0.114530057 | LNCV6_101185_PI430048170 |
| NOX4 | 0.233020817 | LNCV6_105230_PI430048170 |
| NOX4 | 2.176010901 | LNCV6_109985_PI430048170 |
| NOX4 | 0.355057503 | LNCV6_112571_PI430048170 |
| NOX4 | 3.018622702 | LNCV6_84722_PI430048170 |
| NOX4 | 3.275115388 | LNCV6_91167_PI430048170 |
| NDUFB6 | 0.494586762 | LNCV6_100721_PI430048170 |
| SOD2 | 2.150907677 | LNCV6_122599_PI430048170 |
| SOD2 | 2.081386779 | LNCV6_126384_PI430048170 |
| SOD2 | 0.168629042 | LNCV6_2641_PI430048170 |
| SOD2 | 4.736746971 | LNCV6_55110_PI430048170 |
| SOD2 | 0.391063813 | LNCV6_65230_PI430048170 |
| SOD2 | 0.39575823 | LNCV6_69043_PI430048170 |
| SOD2 | 0.333780493 | LNCV6_85819_PI430048170 |
| SOD2 | 3.48061368 | LNCV6_94001_PI430048170 |

Cis-target genes of lncRNAs related to the cell cycle

| **Cis-target gene** | **Fold change(H2O2/Ctrl)** | **LncRNA** |
| --- | --- | --- |
| TGFB1 | 0.247254231 | LNCV6_85408_PI430048170 |
| ORC2 | 0.405401747 | LNCV6_14132_PI430048170 |
| MAD2L1 | 9.111640489 | LNCV6_16425_PI430048170 |
| CCND2 | 2.74491975 | LNCV6_1756_PI430048170 |
| CDC25A | 0.311444661 | LNCV6_122634_PI430048170 |
| STAG2 | 0.422332981 | LNCV6_35047_PI430048170 |
| SMAD2 | 3.781825857 | LNCV6_121061_PI430048170 |
| CDC26 | 2.567800703 | LNCV6_81206_PI430048170 |
| CHEK2 | 2.653403521 | LNCV6_122445_PI430048170 |
| SMAD3 | 0.405236627 | LNCV6_120511_PI430048170 |
| E2F4 | 6.17284135 | LNCV6_29413_PI430048170 |
| GSK3B | 2.540462572 | LNCV6_15122_PI430048170 |
| GSK3B | 2.115486966 | LNCV6_46583_PI430048170 |
| PKMYT1 | 0.484887828 | LNCV6_91631_PI430048170 |
| CDKN1A | 5.61051954 | LNCV6_114357_PI430048170 |
| ESPL1 | 5.43493674 | LNCV6_50886_PI430048170 |
| CDKN2A | 2.378108541 | LNCV6_96819_PI430048170 |
| CDKN2A | 0.413675795 | LNCV6_21712_PI430048170 |
| CDKN2A | 0.435014127 | LNCV6_21701_PI430048170 |
| CDKN2A | 0.2920212 | LNCV6_113712_PI430048170 |
| YWHAE | 0.221756112 | LNCV6_83322_PI430048170 |
| CDC25C | 2.188908925 | LNCV6_94652_PI430048170 |
| CDC25C | 0.147433833 | LNCV6_76034_PI430048170 |
| CDKN2B | 2.378108541 | LNCV6_21712_PI430048170 |
| CDKN2B | 0.413675795 | LNCV6_21701_PI430048170 |
| CDKN2B | 0.435014127 | LNCV6_113712_PI430048170 |
| RBL1 | 0.493854823 | LNCV6_105155_PI430048170 |
| RBL1 | 0.181177316 | LNCV6_102341_PI430048170 |
| CDKN2C | 0.177846516 | LNCV6_54002_PI430048170 |
| CDC7 | 0.217801906 | LNCV6_88329_PI430048170 |
| CDC27 | 0.217801906 | LNCV6_38575_PI430048170 |
| CCNB1 | 0.072505794 | LNCV6_114653_PI430048170 |
| TFDP1 | 0.399077619 | LNCV6_102993_PI430048170 |
| ORC3 | 0.321946545 | LNCV6_111634_PI430048170 |
| MDM2 | 8.651534838 | LNCV6_116382_PI430048170 |
| MDM2 | 4.68834704 | LNCV6_25313_PI430048170 |
| CDK1 | 0.128091509 | LNCV6_67630_PI430048170 |
| YWHAZ | 2.424601162 | LNCV6_80120_PI430048170 |
| YWHAH | 2.010897254 | LNCV6_72341_PI430048170 |
| TTK | 0.192519058 | LNCV6_77466_PI430048170 |
| TTK | 0.098819717 | LNCV6_77467_PI430048170 |

Tran-target genes of lncRNAs related to the cell cycle

| **Tran-target gene** | **Fold change(H2O2/Ctrl)** | **LncRNA** |
| --- | --- | --- |
| ORC6 | 2.279818972 | LNCV6_4677_PI430048170 |
| ORC6 | 2.083103937 | LNCV6_53728_PI430048170 |
| ORC6 | 4.936714716 | LNCV6_54737_PI430048170 |
| ORC6 | 0.376166814 | LNCV6_69283_PI430048170 |
| ORC6 | 13.49426086 | LNCV6_82543_PI430048170 |
| ORC6 | 2.73734527 | LNCV6_84741_PI430048170 |
| ORC6 | 2.513926385 | LNCV6_88835_PI430048170 |
| ORC6 | 0.286567352 | LNCV6_50654_PI430048170 |
| SFN | 0.325425853 | LNCV6_56114_PI430048170 |
| MCM4 | 2.659896359 | LNCV6_37783_PI430048170 |
| MDM2 | 2.071974126 | LNCV6_107407_PI430048170 |
| MDM2 | 4.894891107 | LNCV6_4328_PI430048170 |
| MDM2 | 2.171769567 | LNCV6_53152_PI430048170 |
| MDM2 | 4.126503417 | LNCV6_57591_PI430048170 |
| MDM2 | 0.400786271 | LNCV6_59648_PI430048170 |
| MDM2 | 3.251162837 | LNCV6_61690_PI430048170 |
| MDM2 | 0.471180891 | LNCV6_62141_PI430048170 |
| MDM2 | 3.121681903 | LNCV6_70178_PI430048170 |
| MDM2 | 0.203164284 | LNCV6_72790_PI430048170 |
| MDM2 | 2.338418626 | LNCV6_73103_PI430048170 |
| MDM2 | 0.170264757 | LNCV6_75546_PI430048170 |
| MDM2 | 6.887788384 | LNCV6_78976_PI430048170 |
| MDM2 | 0.067090499 | LNCV6_80366_PI430048170 |
| MDM2 | 6.968479799 | LNCV6_83272_PI430048170 |
| MDM2 | 2.273939774 | LNCV6_89022_PI430048170 |
| MDM2 | 2.915619896 | LNCV6_95569_PI430048170 |
| CHEK1 | 5.164208003 | LNCV6_104048_PI430048170 |
| TP53 | 0.355057503 | LNCV6_50952_PI430048170 |
| TP53 | 2.517089113 | LNCV6_112571_PI430048170 |
| ATM | 2.138862739 | LNCV6_102927_PI430048170 |
| ATM | 2.454880644 | LNCV6_105061_PI430048170 |
| ATM | 2.181279807 | LNCV6_106046_PI430048170 |
| ATM | 2.071974126 | LNCV6_107407_PI430048170 |
| ATM | 0.384223911 | LNCV6_125561_PI430048170 |
| ATM | 3.500273137 | LNCV6_37521_PI430048170 |
| ATM | 2.598969928 | LNCV6_42995_PI430048170 |
| ATM | 4.894891107 | LNCV6_4328_PI430048170 |
| ATM | 0.462775607 | LNCV6_49827_PI430048170 |
| ATM | 3.014301846 | LNCV6_50819_PI430048170 |
| ATM | 0.456659447 | LNCV6_55372_PI430048170 |
| ATM | 4.126503417 | LNCV6_57591_PI430048170 |
| ATM | 2.334499807 | LNCV6_62332_PI430048170 |
| ATM | 0.432573044 | LNCV6_64714_PI430048170 |
| ATM | 4.570929861 | LNCV6_65941_PI430048170 |
| ATM | 0.203164284 | LNCV6_72790_PI430048170 |
| ATM | 2.260146188 | LNCV6_78694_PI430048170 |
| ATM | 0.152802182 | LNCV6_7894_PI430048170 |
| ATM | 0.067090499 | LNCV6_80366_PI430048170 |
| ATM | 2.014341453 | LNCV6_81948_PI430048170 |
| ATM | 6.968479799 | LNCV6_83272_PI430048170 |
| ATM | 3.086194215 | LNCV6_87743_PI430048170 |
| ATM | 2.513926385 | LNCV6_88835_PI430048170 |
| ATM | 0.443360313 | LNCV6_89156_PI430048170 |
| ATM | 2.075765568 | LNCV6_89337_PI430048170 |
| ATM | 2.915619896 | LNCV6_95569_PI430048170 |
| ATM | 0.470488185 | LNCV6_97170_PI430048170 |
| ATM | 0.399228921 | LNCV6_35933_PI430048170 |
| SKP2 | 0.181177316 | LNCV6_105155_PI430048170 |
| SKP2 | 2.14050644 | LNCV6_112538_PI430048170 |
| SKP2 | 2.678469313 | LNCV6_118096_PI430048170 |
| SKP2 | 7.777086037 | LNCV6_118499_PI430048170 |
| SKP2 | 5.046133709 | LNCV6_119109_PI430048170 |
| SKP2 | 0.38929545 | LNCV6_121750_PI430048170 |
| SKP2 | 14.25051838 | LNCV6_123160_PI430048170 |
| SKP2 | 2.285521238 | LNCV6_40577_PI430048170 |
| SKP2 | 2.598969928 | LNCV6_42995_PI430048170 |
| SKP2 | 3.181263407 | LNCV6_47576_PI430048170 |
| SKP2 | 6.65461911 | LNCV6_47866_PI430048170 |
| SKP2 | 2.171769567 | LNCV6_53152_PI430048170 |
| SKP2 | 2.322734276 | LNCV6_59235_PI430048170 |
| SKP2 | 3.251162837 | LNCV6_61690_PI430048170 |
| SKP2 | 2.9533382 | LNCV6_62104_PI430048170 |
| SKP2 | 0.471180891 | LNCV6_62141_PI430048170 |
| SKP2 | 2.334499807 | LNCV6_62332_PI430048170 |
| SKP2 | 0.234107578 | LNCV6_63167_PI430048170 |
| SKP2 | 0.172764847 | LNCV6_63822_PI430048170 |
| SKP2 | 2.338418626 | LNCV6_73103_PI430048170 |
| SKP2 | 5.949894223 | LNCV6_79054_PI430048170 |
| SKP2 | 4.346013581 | LNCV6_79717_PI430048170 |
| SKP2 | 0.067090499 | LNCV6_80366_PI430048170 |
| SKP2 | 5.31186475 | LNCV6_82581_PI430048170 |
| SKP2 | 2.119124832 | LNCV6_82611_PI430048170 |
| SKP2 | 0.439313273 | LNCV6_86002_PI430048170 |
| SKP2 | 0.162313684 | LNCV6_86259_PI430048170 |
| SKP2 | 2.740880794 | LNCV6_86755_PI430048170 |
| SKP2 | 2.162512186 | LNCV6_86793_PI430048170 |
| SKP2 | 4.639467283 | LNCV6_87335_PI430048170 |
| SKP2 | 3.086194215 | LNCV6_87743_PI430048170 |
| SKP2 | 2.273939774 | LNCV6_89022_PI430048170 |
| SKP2 | 2.075765568 | LNCV6_89337_PI430048170 |
| SKP2 | 2.84605537 | LNCV6_89346_PI430048170 |
| SKP2 | 2.604905725 | LNCV6_89849_PI430048170 |
| SKP2 | 2.012051175 | LNCV6_94966_PI430048170 |
| SKP2 | 0.228657904 | LNCV6_96172_PI430048170 |
| SKP2 | 4.844190069 | LNCV6_126407_PI430048170 |
| RBL1 | 0.420191149 | LNCV6_106044_PI430048170 |
| RBL1 | 0.351779563 | LNCV6_3221_PI430048170 |
| RBL1 | 2.104926018 | LNCV6_38333_PI430048170 |
| RBL1 | 0.324915292 | LNCV6_52914_PI430048170 |
| RBL1 | 6.253033092 | LNCV6_58939_PI430048170 |
| RBL1 | 2.387967646 | LNCV6_66915_PI430048170 |
| RBL1 | 7.418387299 | LNCV6_73290_PI430048170 |
| RBL1 | 3.499082612 | LNCV6_83799_PI430048170 |
| RBL1 | 2.73734527 | LNCV6_84741_PI430048170 |
| RBL1 | 2.411240241 | LNCV6_86022_PI430048170 |
| RBL1 | 2.725982335 | LNCV6_90889_PI430048170 |
| RBL1 | 0.286567352 | LNCV6_50654_PI430048170 |
| CDK4 | 2.138862739 | LNCV6_102927_PI430048170 |
| CDK4 | 0.492537649 | LNCV6_46750_PI430048170 |
| CDK4 | 0.324915292 | LNCV6_52914_PI430048170 |
| CDK4 | 2.888388781 | LNCV6_53303_PI430048170 |
| CDK4 | 2.083103937 | LNCV6_53728_PI430048170 |
| CDK4 | 4.936714716 | LNCV6_54737_PI430048170 |
| CDK4 | 3.982867418 | LNCV6_60247_PI430048170 |
| CDK4 | 0.418108748 | LNCV6_89479_PI430048170 |
| CDK4 | 4.598195806 | LNCV6_91728_PI430048170 |
| ORC4 | 0.331150543 | LNCV6_112600_PI430048170 |
| ORC4 | 5.046133709 | LNCV6_119109_PI430048170 |
| ORC4 | 2.599147784 | LNCV6_89771_PI430048170 |
| TFDP2 | 2.138862739 | LNCV6_102927_PI430048170 |
| TFDP2 | 5.164208003 | LNCV6_104048_PI430048170 |
| TFDP2 | 0.41971454 | LNCV6_104212_PI430048170 |
| TFDP2 | 2.505246818 | LNCV6_104294_PI430048170 |
| TFDP2 | 0.181177316 | LNCV6_105155_PI430048170 |
| TFDP2 | 3.108907318 | LNCV6_107318_PI430048170 |
| TFDP2 | 2.071974126 | LNCV6_107407_PI430048170 |
| TFDP2 | 0.355057503 | LNCV6_112571_PI430048170 |
| TFDP2 | 2.121440518 | LNCV6_116020_PI430048170 |
| TFDP2 | 2.63512385 | LNCV6_119344_PI430048170 |
| TFDP2 | 2.110676826 | LNCV6_120114_PI430048170 |
| TFDP2 | 0.219061331 | LNCV6_122670_PI430048170 |
| TFDP2 | 0.384223911 | LNCV6_125561_PI430048170 |
| TFDP2 | 2.081386779 | LNCV6_126384_PI430048170 |
| TFDP2 | 3.877903271 | LNCV6_19727_PI430048170 |
| TFDP2 | 0.351779563 | LNCV6_3221_PI430048170 |
| TFDP2 | 3.500273137 | LNCV6_37521_PI430048170 |
| TFDP2 | 2.104926018 | LNCV6_38333_PI430048170 |
| TFDP2 | 4.409515203 | LNCV6_40849_PI430048170 |
| TFDP2 | 4.958227721 | LNCV6_49686_PI430048170 |
| TFDP2 | 3.014301846 | LNCV6_50819_PI430048170 |
| TFDP2 | 2.394874792 | LNCV6_51086_PI430048170 |
| TFDP2 | 5.113314259 | LNCV6_51109_PI430048170 |
| TFDP2 | 0.324915292 | LNCV6_52914_PI430048170 |
| TFDP2 | 2.888388781 | LNCV6_53303_PI430048170 |
| TFDP2 | 6.253033092 | LNCV6_58939_PI430048170 |
| TFDP2 | 0.400786271 | LNCV6_59648_PI430048170 |
| TFDP2 | 3.942289155 | LNCV6_60767_PI430048170 |
| TFDP2 | 0.369861395 | LNCV6_63477_PI430048170 |
| TFDP2 | 0.432573044 | LNCV6_64714_PI430048170 |
| TFDP2 | 0.432573044 | LNCV6_64714_PI430048170 |
| TFDP2 | 4.745828623 | LNCV6_6970_PI430048170 |
| TFDP2 | 3.121681903 | LNCV6_70178_PI430048170 |
| TFDP2 | 2.234279756 | LNCV6_72493_PI430048170 |
| TFDP2 | 7.418387299 | LNCV6_73290_PI430048170 |
| TFDP2 | 0.34469363 | LNCV6_74592_PI430048170 |
| TFDP2 | 2.260146188 | LNCV6_78694_PI430048170 |
| TFDP2 | 0.354647633 | LNCV6_78880_PI430048170 |
| TFDP2 | 0.067090499 | LNCV6_80366_PI430048170 |
| TFDP2 | 13.49426086 | LNCV6_82543_PI430048170 |
| TFDP2 | 6.968479799 | LNCV6_83272_PI430048170 |
| TFDP2 | 2.73734527 | LNCV6_84741_PI430048170 |
| TFDP2 | 0.331387054 | LNCV6_84779_PI430048170 |
| TFDP2 | 6.856032892 | LNCV6_84818_PI430048170 |
| TFDP2 | 8.696904322 | LNCV6_84894_PI430048170 |
| TFDP2 | 0.178137068 | LNCV6_85145_PI430048170 |
| TFDP2 | 2.411240241 | LNCV6_86022_PI430048170 |
| TFDP2 | 2.996338194 | LNCV6_86057_PI430048170 |
| TFDP2 | 2.162512186 | LNCV6_86793_PI430048170 |
| TFDP2 | 2.948343406 | LNCV6_88369_PI430048170 |
| TFDP2 | 0.484878353 | LNCV6_88647_PI430048170 |
| TFDP2 | 2.513926385 | LNCV6_88835_PI430048170 |
| TFDP2 | 0.3874438 | LNCV6_89089_PI430048170 |
| TFDP2 | 2.075765568 | LNCV6_89337_PI430048170 |
| TFDP2 | 0.418108748 | LNCV6_89479_PI430048170 |
| TFDP2 | 4.444403131 | LNCV6_89494_PI430048170 |
| TFDP2 | 9.203135245 | LNCV6_90117_PI430048170 |
| TFDP2 | 0.441336944 | LNCV6_91351_PI430048170 |
| TFDP2 | 2.915619896 | LNCV6_95569_PI430048170 |
| TFDP2 | 5.694670012 | LNCV6_95688_PI430048170 |
| TFDP2 | 2.240683728 | LNCV6_99366_PI430048170 |
| TFDP2 | 0.231534772 | LNCV6_35679_PI430048170 |
| TFDP2 | 8.124792089 | LNCV6_121535_PI430048170 |
| ORC1 | 0.336693819 | LNCV6_107165_PI430048170 |
| SMAD2 | 0.181177316 | LNCV6_105155_PI430048170 |
| SMAD2 | 2.071974126 | LNCV6_107407_PI430048170 |
| SMAD2 | 0.38929545 | LNCV6_121750_PI430048170 |
| SMAD2 | 0.458157768 | LNCV6_37636_PI430048170 |
| SMAD2 | 2.285521238 | LNCV6_40577_PI430048170 |
| SMAD2 | 3.005289641 | LNCV6_58231_PI430048170 |
| SMAD2 | 0.471180891 | LNCV6_62141_PI430048170 |
| SMAD2 | 2.334499807 | LNCV6_62332_PI430048170 |
| SMAD2 | 0.234107578 | LNCV6_63167_PI430048170 |
| SMAD2 | 0.203164284 | LNCV6_72790_PI430048170 |
| SMAD2 | 2.338418626 | LNCV6_73103_PI430048170 |
| SMAD2 | 0.067090499 | LNCV6_80366_PI430048170 |
| SMAD2 | 5.31186475 | LNCV6_82581_PI430048170 |
| SMAD2 | 2.119124832 | LNCV6_82611_PI430048170 |
| SMAD2 | 0.170329706 | LNCV6_86258_PI430048170 |
| SMAD2 | 2.84605537 | LNCV6_89346_PI430048170 |
| SMAD2 | 0.441336944 | LNCV6_91351_PI430048170 |
| SMAD2 | 2.915619896 | LNCV6_95569_PI430048170 |
| SMAD4 | 5.164208003 | LNCV6_104048_PI430048170 |
| SMAD4 | 2.091937493 | LNCV6_116379_PI430048170 |
| SMAD4 | 4.745828623 | LNCV6_6970_PI430048170 |
| SMAD4 | 2.89892605 | LNCV6_81455_PI430048170 |
| E2F2 | 0.181177316 | LNCV6_105155_PI430048170 |
| E2F2 | 2.678469313 | LNCV6_118096_PI430048170 |
| E2F2 | 2.036617117 | LNCV6_125603_PI430048170 |
| E2F2 | 2.606653266 | LNCV6_125765_PI430048170 |
| E2F2 | 0.478363594 | LNCV6_43360_PI430048170 |
| E2F2 | 3.014301846 | LNCV6_50819_PI430048170 |
| E2F2 | 3.933956191 | LNCV6_74291_PI430048170 |
| E2F2 | 2.20523855 | LNCV6_74318_PI430048170 |
| E2F2 | 5.126495206 | LNCV6_7470_PI430048170 |
| E2F2 | 2.89892605 | LNCV6_81455_PI430048170 |
| E2F2 | 0.441336944 | LNCV6_91351_PI430048170 |
| E2F2 | 0.399228921 | LNCV6_35933_PI430048170 |
| E2F2 | 0.342791667 | LNCV6_119817_PI430048170 |
| E2F2 | 2.493419379 | LNCV6_120175_PI430048170 |
| HDAC2 | 3.561609561 | LNCV6_106771_PI430048170 |
| HDAC2 | 3.730140143 | LNCV6_63530_PI430048170 |
| HDAC2 | 0.127666823 | LNCV6_64734_PI430048170 |
| HDAC2 | 0.170264757 | LNCV6_75546_PI430048170 |
| HDAC2 | 5.949894223 | LNCV6_79054_PI430048170 |

Cis-target genes of lncRNAs related to apoptosis

| **Cis-target gene** | **Fold change(H2O2/Ctrl)** | **LncRNA** |
| --- | --- | --- |
| MAP2K1 | 2.616718697 | LNCV6_52882_PI430048170 |
| CTSL | 2.223839398 | LNCV6_112123_PI430048170 |
| ITPR1 | 2.303856805 | LNCV6_115139_PI430048170 |
| ITPR1 | 8.317857684 | LNCV6_14469_PI430048170 |
| ITPR1 | 2.030814827 | LNCV6_14473_PI430048170 |
| BBC3 | 3.440011546 | LNCV6_41536_PI430048170 |
| FOS | 2.453174735 | LNCV6_120229_PI430048170 |
| PDPK1 | 2.800514874 | LNCV6_112655_PI430048170 |
| PDPK1 | 5.378231508 | LNCV6_28701_PI430048170 |
| PDPK1 | 3.339273285 | LNCV6_28702_PI430048170 |
| PDPK1 | 3.499082612 | LNCV6_83799_PI430048170 |
| GMCL1 | 2.805828039 | LNCV6_110562_PI430048170 |
| BIRC5 | 0.118484067 | LNCV6_115917_PI430048170 |
| MAPK3 | 0.440139783 | LNCV6_106169_PI430048170 |
| TNFRSF10A | 0.480364063 | LNCV6_254_PI430048170 |
| BID | 0.355552143 | LNCV6_8716_PI430048170 |
| FAS | 2.136651969 | LNCV6_118984_PI430048170 |
| TNFRSF10B | 3.017922817 | LNCV6_79639_PI430048170 |
| MAP2K2 | 2.616766574 | LNCV6_68497_PI430048170 |
| MAP3K14 | 0.460212467 | LNCV6_120797_PI430048170 |
| MAP3K14 | 0.399806975 | LNCV6_120819_PI430048170 |
| MAP3K14 | 0.141049241 | LNCV6_120820_PI430048170 |
| MAP3K14 | 0.389470294 | LNCV6_120821_PI430048170 |
| XIAP | 2.167343918 | LNCV6_126124_PI430048170 |
| AKT3 | 2.216528663 | LNCV6_12240_PI430048170 |
| ERN1 | 3.825597239 | LNCV6_52948_PI430048170 |
| CASP7 | 0.21493055 | LNCV6_23283_PI430048170 |
| CASP7 | 2.077865998 | LNCV6_91081_PI430048170 |
| TUBA1B | 0.467537429 | LNCV6_25081_PI430048170 |
| CASP6 | 0.212584051 | LNCV6_16376_PI430048170 |
| TGFB1 | 0.247254231 | LNCV6_85408_PI430048170 |
| ORC2 | 0.405401747 | LNCV6_14132_PI430048170 |
| MAD2L1 | 9.111640489 | LNCV6_16425_PI430048170 |
| CCND2 | 2.74491975 | LNCV6_1756_PI430048170 |
| CDC25A | 0.311444661 | LNCV6_122634_PI430048170 |
| STAG2 | 0.422332981 | LNCV6_35047_PI430048170 |
| SMAD2 | 3.781825857 | LNCV6_121061_PI430048170 |
| CDC26 | 2.567800703 | LNCV6_81206_PI430048170 |
| CHEK2 | 2.653403521 | LNCV6_122445_PI430048170 |
| SMAD3 | 0.405236627 | LNCV6_120511_PI430048170 |
| E2F4 | 6.17284135 | LNCV6_29413_PI430048170 |
| GSK3B | 2.540462572 | LNCV6_15122_PI430048170 |
| GSK3B | 2.115486966 | LNCV6_46583_PI430048170 |
| PKMYT1 | 0.484887828 | LNCV6_91631_PI430048170 |
| CDKN1A | 5.61051954 | LNCV6_114357_PI430048170 |
| ESPL1 | 5.43493674 | LNCV6_50886_PI430048170 |
| CDKN2A | 2.378108541 | LNCV6_113712_PI430048170 |
| CDKN2A | 0.413675795 | LNCV6_21701_PI430048170 |
| CDKN2A | 0.435014127 | LNCV6_96819_PI430048170 |
| CDKN2A | 0.2920212 | LNCV6_21712_PI430048170 |
| YWHAE | 0.221756112 | LNCV6_83322_PI430048170 |
| CDC25C | 2.188908925 | LNCV6_76034_PI430048170 |
| CDC25C | 0.147433833 | LNCV6_94652_PI430048170 |
| CDKN2B | 2.378108541 | LNCV6_113712_PI430048170 |
| CDKN2B | 0.413675795 | LNCV6_21701_PI430048170 |
| CDKN2B | 0.435014127 | LNCV6_21712_PI430048170 |
| RBL1 | 0.493854823 | LNCV6_102341_PI430048170 |
| RBL1 | 0.181177316 | LNCV6_105155_PI430048170 |
| CDKN2C | 0.177846516 | LNCV6_54002_PI430048170 |
| CDC7 | 0.217801906 | LNCV6_54305_PI430048170 |
| CDC27 | 0.145647844 | LNCV6_38575_PI430048170 |
| CCNB1 | 0.072505794 | LNCV6_114653_PI430048170 |
| TFDP1 | 0.399077619 | LNCV6_102993_PI430048170 |
| ORC3 | 0.321946545 | LNCV6_111634_PI430048170 |
| MDM2 | 0.358265556 | LNCV6_116382_PI430048170 |
| MDM2 | 8.651534838 | LNCV6_25313_PI430048170 |
| CDK1 | 0.128091509 | LNCV6_67630_PI430048170 |
| YWHAZ | 2.424601162 | LNCV6_80120_PI430048170 |
| YWHAH | 2.010897254 | LNCV6_72341_PI430048170 |
| TTK | 0.192519058 | LNCV6_77466_PI430048170 |
| TTK | 0.098819717 | LNCV6_77467_PI430048170 |

Tran-target genes of lncRNAs related to apoptosis

| **Tran-target gene** | **Fold change(H2O2/Ctrl)** | **LncRNA** |
| --- | --- | --- |
| TP53AIP1 | 2.176010901 | LNCV6_109985_PI430048170 |
| CASP10 | 2.394874792 | LNCV6_51156_PI430048170 |
| CASP10 | 0.100267957 | LNCV6_51086_PI430048170 |
| PIK3R2 | 4.958227721 | LNCV6_49686_PI430048170 |
| CASP6 | 2.659896359 | LNCV6_52914_PI430048170 |
| CASP6 | 0.324915292 | LNCV6_37783_PI430048170 |
| CASP7 | 35.9259341 | LNCV6_118788_PI430048170 |
| APAF1 | 0.401231098 | LNCV6_103812_PI430048170 |
| APAF1 | 2.219983462 | LNCV6_58964_PI430048170 |
| APAF1 | 3.730140143 | LNCV6_63530_PI430048170 |
| APAF1 | 2.188908925 | LNCV6_76034_PI430048170 |
| APAF1 | 0.032904311 | LNCV6_77279_PI430048170 |
| APAF1 | 2.604905725 | LNCV6_89849_PI430048170 |
| TP53 | 0.355057503 | LNCV6_50952_PI430048170 |
| TP53 | 2.517089113 | LNCV6_112571_PI430048170 |
| DFFA | 2.625884988 | LNCV6_102130_PI430048170 |
| DFFA | 2.625884988 | LNCV6_102130_PI430048170 |
| DFFA | 2.138862739 | LNCV6_102927_PI430048170 |
| DFFA | 0.41971454 | LNCV6_104212_PI430048170 |
| DFFA | 0.233020817 | LNCV6_105230_PI430048170 |
| DFFA | 0.233020817 | LNCV6_105230_PI430048170 |
| DFFA | 2.176010901 | LNCV6_109985_PI430048170 |
| DFFA | 2.176010901 | LNCV6_109985_PI430048170 |
| DFFA | 0.355057503 | LNCV6_112571_PI430048170 |
| DFFA | 0.081016387 | LNCV6_113061_PI430048170 |
| DFFA | 0.081016387 | LNCV6_113061_PI430048170 |
| DFFA | 5.046133709 | LNCV6_119109_PI430048170 |
| DFFA | 0.361652955 | LNCV6_122168_PI430048170 |
| DFFA | 2.432319184 | LNCV6_42453_PI430048170 |
| DFFA | 0.402701865 | LNCV6_43541_PI430048170 |
| DFFA | 7.301462801 | LNCV6_46738_PI430048170 |
| DFFA | 7.301462801 | LNCV6_46738_PI430048170 |
| DFFA | 4.06784163 | LNCV6_49339_PI430048170 |
| DFFA | 3.825597239 | LNCV6_52948_PI430048170 |
| DFFA | 2.888388781 | LNCV6_53303_PI430048170 |
| DFFA | 6.380870905 | LNCV6_53882_PI430048170 |
| DFFA | 2.317987964 | LNCV6_55531_PI430048170 |
| DFFA | 2.317987964 | LNCV6_55531_PI430048170 |
| DFFA | 0.397262219 | LNCV6_56668_PI430048170 |
| DFFA | 0.397262219 | LNCV6_56668_PI430048170 |
| DFFA | 0.198806466 | LNCV6_60488_PI430048170 |
| DFFA | 4.02577496 | LNCV6_63508_PI430048170 |
| DFFA | 2.655802791 | LNCV6_64013_PI430048170 |
| DFFA | 0.127666823 | LNCV6_64734_PI430048170 |
| DFFA | 0.18006074 | LNCV6_65619_PI430048170 |
| DFFA | 0.18006074 | LNCV6_65619_PI430048170 |
| DFFA | 8.831526936 | LNCV6_67194_PI430048170 |
| DFFA | 7.418387299 | LNCV6_73290_PI430048170 |
| DFFA | 3.053799044 | LNCV6_78580_PI430048170 |
| DFFA | 0.354647633 | LNCV6_78880_PI430048170 |
| DFFA | 2.422562693 | LNCV6_81015_PI430048170 |
| DFFA | 0.392729224 | LNCV6_8331_PI430048170 |
| DFFA | 0.392729224 | LNCV6_8331_PI430048170 |
| DFFA | 0.331387054 | LNCV6_84779_PI430048170 |
| DFFA | 6.856032892 | LNCV6_84818_PI430048170 |
| DFFA | 0.178137068 | LNCV6_85145_PI430048170 |
| DFFA | 0.333780493 | LNCV6_85819_PI430048170 |
| DFFA | 0.162313684 | LNCV6_86259_PI430048170 |
| DFFA | 0.43121281 | LNCV6_87437_PI430048170 |
| DFFA | 0.43121281 | LNCV6_87437_PI430048170 |
| DFFA | 0.372232811 | LNCV6_87472_PI430048170 |
| DFFA | 2.513926385 | LNCV6_88835_PI430048170 |
| DFFA | 0.443360313 | LNCV6_89156_PI430048170 |
| DFFA | 0.418108748 | LNCV6_89479_PI430048170 |
| DFFA | 5.694670012 | LNCV6_95688_PI430048170 |
| XIAP | 0.494586762 | LNCV6_100721_PI430048170 |
| XIAP | 0.456660893 | LNCV6_101454_PI430048170 |
| XIAP | 2.625884988 | LNCV6_102130_PI430048170 |
| XIAP | 2.138862739 | LNCV6_102927_PI430048170 |
| XIAP | 2.142912255 | LNCV6_103540_PI430048170 |
| XIAP | 2.505246818 | LNCV6_104294_PI430048170 |
| XIAP | 0.250789056 | LNCV6_110727_PI430048170 |
| XIAP | 0.355057503 | LNCV6_112571_PI430048170 |
| XIAP | 0.081016387 | LNCV6_113061_PI430048170 |
| XIAP | 5.50517083 | LNCV6_113827_PI430048170 |
| XIAP | 2.121440518 | LNCV6_116020_PI430048170 |
| XIAP | 0.455776635 | LNCV6_117935_PI430048170 |
| XIAP | 2.218705943 | LNCV6_118181_PI430048170 |
| XIAP | 7.777086037 | LNCV6_118499_PI430048170 |
| XIAP | 5.046133709 | LNCV6_119109_PI430048170 |
| XIAP | 2.63512385 | LNCV6_119344_PI430048170 |
| XIAP | 6.185076134 | LNCV6_121364_PI430048170 |
| XIAP | 0.492162953 | LNCV6_124831_PI430048170 |
| XIAP | 3.621386658 | LNCV6_124844_PI430048170 |
| XIAP | 2.109271445 | LNCV6_125369_PI430048170 |
| XIAP | 0.186555687 | LNCV6_14847_PI430048170 |
| XIAP | 0.120282721 | LNCV6_14848_PI430048170 |
| XIAP | 0.351779563 | LNCV6_3221_PI430048170 |
| XIAP | 0.253119576 | LNCV6_34861_PI430048170 |
| XIAP | 0.261193943 | LNCV6_37309_PI430048170 |
| XIAP | 0.402366952 | LNCV6_37343_PI430048170 |
| XIAP | 0.458157768 | LNCV6_37636_PI430048170 |
| XIAP | 2.046298791 | LNCV6_37642_PI430048170 |
| XIAP | 2.104926018 | LNCV6_38333_PI430048170 |
| XIAP | 2.956565599 | LNCV6_38369_PI430048170 |
| XIAP | 11.03320692 | LNCV6_38759_PI430048170 |
| XIAP | 2.432319184 | LNCV6_42453_PI430048170 |
| XIAP | 2.598969928 | LNCV6_42995_PI430048170 |
| XIAP | 0.402701865 | LNCV6_43541_PI430048170 |
| XIAP | 0.340429137 | LNCV6_4396_PI430048170 |
| XIAP | 0.325042265 | LNCV6_45721_PI430048170 |
| XIAP | 2.769000031 | LNCV6_46126_PI430048170 |
| XIAP | 7.301462801 | LNCV6_46738_PI430048170 |
| XIAP | 0.440286229 | LNCV6_47444_PI430048170 |
| XIAP | 3.181263407 | LNCV6_47576_PI430048170 |
| XIAP | 6.65461911 | LNCV6_47866_PI430048170 |
| XIAP | 0.449957921 | LNCV6_48505_PI430048170 |
| XIAP | 4.06784163 | LNCV6_49339_PI430048170 |
| XIAP | 2.178747259 | LNCV6_50765_PI430048170 |
| XIAP | 3.014301846 | LNCV6_50819_PI430048170 |
| XIAP | 2.239469922 | LNCV6_51437_PI430048170 |
| XIAP | 0.324915292 | LNCV6_52914_PI430048170 |
| XIAP | 3.825597239 | LNCV6_52948_PI430048170 |
| XIAP | 2.171769567 | LNCV6_53152_PI430048170 |
| XIAP | 2.904439558 | LNCV6_53223_PI430048170 |
| XIAP | 8.006731706 | LNCV6_55132_PI430048170 |
| XIAP | 2.317987964 | LNCV6_55531_PI430048170 |
| XIAP | 0.257258655 | LNCV6_55950_PI430048170 |
| XIAP | 2.218787077 | LNCV6_56950_PI430048170 |
| XIAP | 3.995393352 | LNCV6_58433_PI430048170 |
| XIAP | 6.253033092 | LNCV6_58939_PI430048170 |
| XIAP | 2.322734276 | LNCV6_59235_PI430048170 |
| XIAP | 2.267659099 | LNCV6_59576_PI430048170 |
| XIAP | 0.400786271 | LNCV6_59648_PI430048170 |
| XIAP | 3.982867418 | LNCV6_60247_PI430048170 |
| XIAP | 0.198806466 | LNCV6_60488_PI430048170 |
| XIAP | 3.194496464 | LNCV6_61239_PI430048170 |
| XIAP | 0.454773488 | LNCV6_62116_PI430048170 |
| XIAP | 2.334499807 | LNCV6_62332_PI430048170 |
| XIAP | 4.02577496 | LNCV6_63508_PI430048170 |
| XIAP | 0.127666823 | LNCV6_64734_PI430048170 |
| XIAP | 0.226477067 | LNCV6_65029_PI430048170 |
| XIAP | 2.387967646 | LNCV6_66915_PI430048170 |
| XIAP | 8.831526936 | LNCV6_67194_PI430048170 |
| XIAP | 0.376166814 | LNCV6_69283_PI430048170 |
| XIAP | 0.09261666 | LNCV6_70330_PI430048170 |
| XIAP | 2.026081529 | LNCV6_71882_PI430048170 |
| XIAP | 2.234279756 | LNCV6_72493_PI430048170 |
| XIAP | 4.225793506 | LNCV6_72710_PI430048170 |
| XIAP | 0.103872139 | LNCV6_73127_PI430048170 |
| XIAP | 7.418387299 | LNCV6_73290_PI430048170 |
| XIAP | 5.260290208 | LNCV6_74479_PI430048170 |
| XIAP | 2.91186597 | LNCV6_74761_PI430048170 |
| XIAP | 3.053799044 | LNCV6_78580_PI430048170 |
| XIAP | 2.260146188 | LNCV6_78694_PI430048170 |
| XIAP | 8.135497269 | LNCV6_78977_PI430048170 |
| XIAP | 0.173091195 | LNCV6_82535_PI430048170 |
| XIAP | 5.31186475 | LNCV6_82581_PI430048170 |
| XIAP | 0.392729224 | LNCV6_8331_PI430048170 |
| XIAP | 3.499082612 | LNCV6_83799_PI430048170 |
| XIAP | 0.331387054 | LNCV6_84779_PI430048170 |
| XIAP | 6.856032892 | LNCV6_84818_PI430048170 |
| XIAP | 0.178137068 | LNCV6_85145_PI430048170 |
| XIAP | 0.247254231 | LNCV6_85408_PI430048170 |
| XIAP | 0.333780493 | LNCV6_85819_PI430048170 |
| XIAP | 2.996338194 | LNCV6_86057_PI430048170 |
| XIAP | 0.170329706 | LNCV6_86258_PI430048170 |
| XIAP | 0.162313684 | LNCV6_86259_PI430048170 |
| XIAP | 0.372825807 | LNCV6_86738_PI430048170 |
| XIAP | 2.740880794 | LNCV6_86755_PI430048170 |
| XIAP | 3.602080748 | LNCV6_86817_PI430048170 |
| XIAP | 0.43121281 | LNCV6_87437_PI430048170 |
| XIAP | 0.372232811 | LNCV6_87472_PI430048170 |
| XIAP | 2.168055762 | LNCV6_87667_PI430048170 |
| XIAP | 2.080557168 | LNCV6_88122_PI430048170 |
| XIAP | 0.324603588 | LNCV6_88733_PI430048170 |
| XIAP | 2.513926385 | LNCV6_88835_PI430048170 |
| XIAP | 0.3874438 | LNCV6_89089_PI430048170 |
| XIAP | 0.418108748 | LNCV6_89479_PI430048170 |
| XIAP | 4.444403131 | LNCV6_89494_PI430048170 |
| XIAP | 9.203135245 | LNCV6_90117_PI430048170 |
| XIAP | 0.487706078 | LNCV6_90298_PI430048170 |
| XIAP | 2.725982335 | LNCV6_90889_PI430048170 |
| XIAP | 2.172916825 | LNCV6_93330_PI430048170 |
| XIAP | 2.962522976 | LNCV6_93888_PI430048170 |
| XIAP | 5.694670012 | LNCV6_95688_PI430048170 |
| XIAP | 2.747442023 | LNCV6_98874_PI430048170 |
| XIAP | 0.44173181 | LNCV6_118215_PI430048170 |
| XIAP | 3.018451861 | LNCV6_121182_PI430048170 |
