# Supplementary material for: Bioinformatics-Based Identification of lncRNA-miRNA-mRNA Network in Dilated Cardiomyopathy and Drug Prediction
Source: Hindawi journal article supplement (doi:10.1155/2021/5566316), 2021-03-04
Supplement: f3 [file 5566316.f3.docx]

**Table S3**.

821 drug names corresponding to NFE2L2.

| **Drug name（Top 421）** | **Drug name（** **Back 420）** |
| --- | --- |
| ANDALUSOL | CHEMBL598263 |
| LAGASCATRIOL | PYRIDABEN |
| SUFORAPHANE ISOSELENOCYANATE | CHEMBL538965 |
| CHEMBL128729 | PROPARGITE |
| CHEMBL528390 | AROMATICIN |
| TRICHLORMETHINE | CHEMBL601547 |
| PENDIMETHALIN | 2-AMINOANTHRACENE |
| BROMOCHLOROACETIC ACID | DIPHENADIONE |
| CHEMBL443436 | CHEMBL1579130 |
| BETANAPHTHOL | CHEMBL596839 |
| PREGNENOLONE CARBONITRILE | MEDRYSONE |
| TANNIN PYROGALLOL | ETHYNODIOL DIACETATE |
| TRIBROMOACETIC ACID | CHEMBL1304363 |
| CHEMBL259865 | 8-CYCLOPENTYLTHEOPHYLLINE |
| SIDURON | CHEMBL578915 |
| CHEMBL1761683 | CHEMBL118417 |
| CHEMBL83761 | CHEMBL591876 |
| DEMETON-S-METHYL | DIGITOXIGENIN |
| CHEMBL1563896 | PREGNENOLONE |
| CHEMBL602383 | CHEMBL582983 |
| PYRIDALYL | LINTITRIPT |
| CARBENOXOLONE SODIUM | OXYCARBOXIN |
| TRICHLORFON | CHEMBL601550 |
| BROMODICHLOROACETIC ACID | PHENMEDIPHAM |
| NIZOFENONE | BROMOXYNIL |
| BROMAMINIC ACID | GITOXIGENIN |
| 1-NAPHTHOL | BENZOTHIAZYL DISULFIDE |
| NOVIFLUMURON | DINITRO CRESOL |
| DIMETHYL FUMARATE | PHENFORMIN HYDROCHLORIDE |
| AMITRAZ | ANETHOLTRITHION |
| BROMODIOLONE | ALDRIN |
| BENZO[B]TRIPHENYLENE | IONOMYCIN |
| CHEMBL1363033 | BARDOXOLONE METHYL |
| S-METOLACHLOR | MORNIFLUMATE |
| CHLOROPHENOTHANE | TRIBUTYLTIN-OXIDE |
| SIMETRIDE | PROPYLPARABEN |
| TRICYCLAZOLE | CLOROPHENE |
| MANEB | CHEMBL398363 |
| CHEMBL585439 | QUESTIOMYCIN B |
| CHEMBL167529 | PROPANTHELINE BROMIDE |
| PIPOXOLAN HYDROCHLORIDE | DIFENOCONAZOLE |
| 2-BROMOETHANOL | TRICIRIBINE |
| CYMOXANIL | CHEMBL600306 |
| CHEMBL531079 | LONIDAMINE |
| DIMETHISTERONE | CHEMBL601137 |
| CARFENTRAZONE-ETHYL | DESOXIMETASONE |
| MOLINATE | INDOLE-3-BUTYRIC ACID |
| THIOCYCLAM HYDROGEN OXALATE | CHEMBL599100 |
| ALPHA-ENDOSULFAN | CHEMBL2094567 |
| METHOPRENE | CHEMBL269881 |
| CHEMBL443343 | TRYPTANTHRIN |
| IOPANOIC ACID | TIRATRICOL |
| BUPROFEZIN | METHOXYCHLOR |
| CHLOROTRIPHENYLSTANNANE | DIETHYLCARBAMAZINE CITRATE |
| (1R)-TRANS-TETRAMETHRIN | RIMEXOLONE |
| CHEMBL529986 | TEROXIRONE |
| CHEMBL583351 | CHEMBL589711 |
| OCTABENZONE | 2-PHENYLPHENOL |
| AMINOCARB | DIFLUNISAL |
| ANCITABINE | CHEMBL584269 |
| CHEMBL591631 | CHEMBL577660 |
| CHEMBL29878 | CHEMBL599943 |
| HYDROCORTISONE HEMISUCCINATE | 4-NONYLPHENOL |
| CHEMBL138061 | CHEMBL591412 |
| ALLO-OCIMENE | MOMETASONE FUROATE |
| CHEMBL592363 | HARMINE HYDROCHLORIDE |
| METOLACHOR | PYRACLOSTROBIN |
| CHEMBL167316 | BISPHENOL A |
| ISOPROPYL PALMITATE | NAMODENOSON |
| CHEMBL1863271 | CHLORPYRIFOS |
| CHLOROXYLENOL | NAPHTHOQUINONE |
| RESMETHRIN | CORTICOSTERONE |
| CHEMBL53738 | BENZOQUINONE |
| NEPAPRAZOLE | ACETOCHLOR |
| CHEMBL587229 | CHRYSOPHANOL |
| CHEMBL601822 | CHEMBL515617 |
| CHEMBL254077 | SB-242084 |
| CHEMBL587389 | DIBUCAINE HYDROCHLORIDE |
| CHEMBL163970 | ENDOSULFAN |
| METHYLEUGENOL | DIBENZ[A,H]ANTHRACENE |
| GAMMA-CYHALOTHRIN | CHEMBL535307 |
| FOSPIRATE | DILAZEP |
| 1-HYDROXY-4-ETHOXYBENZENE | CHEMBL591370 |
| ABSCISIC ACID | TIOXOLONE |
| BITERTANOL | (S)-ROSCOVITINE |
| METHYL ABIETATE | CHEMBL530361 |
| PELUBIPROFEN | FEPRAZONE |
| CHEMBL604528 | NELFINAVIR MESYLATE |
| 1-NITROPYRENE | PHENACYL CHLORIDE |
| 6-CHLOROFLAVONE | CHOLESTEROL |
| MALINAMIDE | ERGOCALCIFEROL |
| BENODANIL | GUGGULSTERONE |
| RONNEL | DIBUTYLDICHLOROSTANNANE |
| DESACETOXYMATRICARIN | CHEMBL598270 |
| PICONOL | OXYQUINOLINE |
| P-TOLUENESULFONAMIDE | CHEMBL547269 |
| FLOCTAFENINE | RETINYL ACETATE |
| DEHYDROEPIANDROSTERONE ACETATE | CAPSAICIN |
| PAMICOGREL | MALATHION |
| 2-NITROFLUORENE | BENZYL ISOTHIOCYANATE |
| TOLPERISONE HYDROCHLORIDE | CHEMBL590706 |
| DINITROPHENYLENE | CHEMBL1492017 |
| METHYL ALCOHOL | 2'-HYDROXYCHALCONE |
| ANCITABINE HYDROCHLORIDE | CHEMBL153057 |
| ALPHA-PHELLANDRENE | 2,4-DIHYDROXYBENZOPHENONE |
| E232 | NEFAZODONE HYDROCHLORIDE |
| METHYLPARABEN | CHEMBL583558 |
| AZOSEMIDE | CHEMBL584635 |
| CHEMBL601320 | MECHLORETHAMINE HYDROCHLORIDE |
| PIRITREXIM ISETHIONATE | CHEMBL84685 |
| THIAMINE | EMETINE HYDROCHLORIDE |
| TRIDECAN-1-OL | METHYCLOTHIAZIDE |
| CHLOROACETIC ACID | E-GUGGULSTERONE |
| DICHLORISONE ACETATE | SPIRAMIDE |
| CHEMBL590422 | INDOLE-3-CARBINOL |
| DACTHAL | NIFUROXAZIDE |
| PREDNISOLONE SODIUM SUCCINATE | CHEMBL1098875 |
| CHEMBL600971 | PAPAVERINE HYDROCHLORIDE |
| 7-BENZYLOXYCOUMARIN | CARBARIL |
| CIS/TRANS-ISOEUGENOL | CHEMBL531268 |
| CHEMBL398412 | IDAZOXAN |
| PHENOXYCARB | CHEMBL609438 |
| METHIOCARB | CHEMBL388823 |
| CHRYSENE | STROPHANTHIDIN |
| CHEMBL601353 | THIOINOSINE |
| CHEMBL172988 | LINOLEIC ACID |
| CHEMBL1531222 | PENTAMIDINE ISETHIONATE |
| CHEMBL148831 | CHLORDANE |
| CHEMBL225257 | CHEMBL54918 |
| FENBUCONAZOLE | MESO-HEXESTROL |
| METHANESULFONIC ACID METHYL ESTER | DICHLORVOS |
| CHEMBL602424 | CHEMBL388979 |
| MEPANIPYRIM | CHEMBL581880 |
| CHEMBL168075 | PYRROLIDINE DITHIOCARBAMIC ACID, AMMONIUM SALT |
| FIBROBLAST GROWTH FACTOR-1 | CHEMBL259784 |
| FENAMIDONE | CHEMBL597035 |
| ISOFENPHOS | CHEMBL536166 |
| CHEMBL555242 | CHEMBL585240 |
| NITROMIDE | CHEMBL1170485 |
| CHEMBL426404 | CHEMBL584514 |
| CHEMBL177991 | FLUTAMIDE |
| HYDROCORTISONE ACETATE | EPOETIN BETA |
| DOCUSATE SODIUM | CHEMBL581574 |
| METACRESOL | CHEMBL530291 |
| CHEMBL536599 | CHEMBL1287983 |
| NANDROLONE | AMINACRINE HYDROCHLORIDE |
| CHEMBL583584 | SAQUINAVIR MESYLATE |
| RIMSULFURON | CHEMBL581872 |
| CHEMBL166112 | CHEMBL38508 |
| CHEMBL582081 | BENZO[B]FLUORANTHENE |
| BIPHENYL | PROPACHLOR |
| CHLOROPHACINONE | TRILOSTANE |
| TRIFLUMIZOLE | CLIOXANIDE |
| E1501 | PIFEXOLE |
| ISOFLUPREDONE ACETATE | NORGESTREL |
| STROPHANTHIDIN ACETATE | CHEMBL1287980 |
| ANISOCOUMARIN H | STILONIUM IODIDE |
| CHEMBL1257022 | BROMOCRIPTINE MESYLATE |
| ISATIN | LANATOSIDE C |
| FENHEXAMID | CHEMBL600360 |
| CHEMBL577662 | PROROXAN HYDROCHLORIDE |
| DICHLORODIMETHYLSTANNANE | CHEMBL578675 |
| QUINOXYFEN | CHEMBL600692 |
| METHYLPREDNISOLONE ACETATE | DIHYDROXANTHOHUMOL |
| PENTACHLORONITROBENZENE | SOFALCONE |
| TETRANITROMETHANE | CHEMBL528181 |
| DESMEDIPHAM | CHEMBL527585 |
| CHEMBL591630 | CHEMBL601146 |
| HYDROXYFLUTAMIDE | CHEMBL578504 |
| OXENDOLONE | HEXYLRESORCINOL |
| KAVAIN | RETINAL |
| CHEMBL533388 | EPIRUBICIN HYDROCHLORIDE |
| HALAZONE | DEFEROXAMINE |
| CANRENONE | HYPERICIN |
| FURAZABOL | NILUTAMIDE |
| FUMAGILLIN | DIENESTROL |
| DEBRISOQUIN SULFATE | PHENOL |
| IROFULVEN | 4-AMINOPHENOL |
| EUPAROTIN ACETATE | DIPYRITHIONE |
| NEOSTIGMINE METHYLSULFATE | TELMISARTAN |
| DAZOMET | CHEMBL606167 |
| FLUORANTHENE | 2-METHOXY-1,4-NAPHTHOQUINONE |
| TETRAZOLIUM RED | BIS(DIMETHYLAMINETHIOCARBONYL)MONOSULFIDE |
| FIPRONIL | KAMEBANIN |
| CHEMBL586982 | PHENTOLAMINE MESYLATE |
| CHEMBL295337 | PROCHLORPERAZINE EDISYLATE |
| FURAZOLIDONE | TAZAROTENE |
| TETRADIFON | STANOLONE |
| BUTACHLOR | CHEMBL584442 |
| TROVAFLOXACIN MESYLATE | BERBERINE CHLORIDE |
| CHEMBL285157 | MITONAFIDE |
| 2-ACETYLAMINOFLUORENE | CHEMBL580727 |
| FENPYROXYMATE | TETRABROMOBENZOTRIAZOLE |
| PHENYLPYRUVATE | BETAMETHASONE |
| CHEMBL593366 | FLAVONE |
| DEXBUDESONIDE | CHEMBL68096 |
| PYRIPROXYFEN | CHEMBL586135 |
| PHENAZINE | LOPINAVIR |
| ATORVASTATIN CALCIUM | CHEMBL1537417 |
| CHEMBL529138 | THONZONIUM BROMIDE |
| TRETAZICAR | CHEMBL600313 |
| AZAMETHIPHOS | CHEMBL220845 |
| ARTEANNUIN B | 2-MERCAPTOBENZOTHIAZOLE |
| CHEMBL296021 | PHENOXYBENZAMINE HYDROCHLORIDE |
| CARBENDAZIM | CHEMBL578502 |
| PYRAFLUFEN-ETHYL | BREFELDIN A |
| ARISTOLOCHIC ACID | LASALOCID A SODIUM |
| ADEFOVIR DIPIVOXIL | COUMESTROL |
| CHEMBL582073 | CHEMBL588038 |
| DARGLITAZONE | BLEOMYCIN |
| OXADIAZON | PHENYLALANINE |
| CHEMBL531710 | FLUFENAMIC ACID |
| SALICYLANILIDE | BUSPIRONE |
| METHABENZTHIAZURON | BACLOFEN |
| CHEMBL73380 | CLOXYQUIN |
| DIELDRIN | CHEMBL579318 |
| ETOXAZOLE | OXYMETHOLONE |
| BROMETHALIN | CHEMBL609606 |
| CHEMBL225563 | LITHOCHOLIC ACID |
| PYRITHIONE SODIUM | BENZO(K)FLUORANTHENE |
| FLUMETHASONE PIVALATE | TRICLOSAN |
| CHEMBL592305 | CHEMBL585656 |
| CHEMBL578636 | DOPAMINE HYDROCHLORIDE |
| LUFENURON | CHEMBL428064 |
| NITROFURAZONE | MEFENAMIC ACID |
| CHEMBL609570 | CHEMBL375270 |
| TENATOPRAZOLE | NORETHINDRONE |
| CHEMBL582055 | CHEMBL22062 |
| CRUFOMATE | CHEMBL576208 |
| FLUFENACET | CHEMBL2002487 |
| DEXAMETHASONE SODIUM PHOSPHATE | LEVOTHYROXINE |
| NITROFEN | CHEMBL578944 |
| CHEMBL599102 | 9-AMINOCAMPTOTHECIN |
| BENOXACOR | CADMIUM DICHLORIDE |
| CHEMBL87568 | CHEMBL600734 |
| TILIQUINOL | PARAROSANILINE |
| OXYQUINOLINE SULFATE | TOPOTECAN HYDROCHLORIDE |
| METHYL YELLOW | TOLFENAMIC ACID |
| MESOTRIONE | ANGUSTIBALIN |
| CHEMBL547977 | MITOTANE |
| QUINIZARIN | CHEMBL1362503 |
| BUPIRIMATE | AURIN |
| DIBROMOACETIC ACID | OUABAIN |
| CHEMBL607253 | NITROFURANTOIN |
| CHEMBL443949 | CHEMBL585502 |
| STIROFOS | LY-294002 |
| CHEMBL609027 | E319 |
| CHEMBL253989 | CHEMBL329673 |
| GLUTARAL | CHOLECALCIFEROL |
| CHLOROXURON | CHEMBL124006 |
| CHEMBL586061 | NITAZOXANIDE |
| PROPYL GALLATE | COUMARIN |
| CHEMBL528647 | BECLOMETHASONE |
| CHEMBL196585 | CHEMBL482050 |
| THIORPHAN | CHEMBL81782 |
| HAPLAMINE | KEPONE |
| CHEMBL607140 | MORICIZINE HYDROCHLORIDE |
| ATOVAQUONE | PD-169316 |
| TECTOQUINONE | AZOXYSTROBIN |
| DICUMAROL | ETHACRYNIC ACID |
| LOTEPREDNOL ETABONATE | CHEMBL1453126 |
| BECLOMETHASONE DIPROPIONATE | GALLIC ACID |
| ALDICARB | PINAFIDE |
| CYPRODINIL | SU-9516 |
| IOXYNIL | WORTMANNIN |
| TRIS(2,3-DIBROMOPROPYL)PHOSPHATE | CHEMBL1079460 |
| PIPOBROMAN | CETYLPYRIDINIUM BROMIDE |
| DEFEROXAMINE MESYLATE | VATALANIB |
| TEMEFOS | E324 |
| CHEMBL403741 | NANAOMYCIN |
| TRICLOFENOL | FINASTERIDE |
| CYPROTERONE ACETATE | CHEMBL533226 |
| OXYPHENONIUM BROMIDE | OXYPHENBUTAZONE |
| ALFUZOSIN HYDROCHLORIDE | CHEMBL184450 |
| DYDROGESTERONE | CHEMBL584458 |
| CHEMBL69367 | NITROXOLINE |
| CHEMBL530682 | CHEMBL275311 |
| NIHYDRAZONE | PHENOXYBENZAMINE |
| PANTOPRAZOLE SODIUM | EXEMESTANE |
| DIMETHENAMID | ROTENONE |
| METHYSTICIN | MEDROXYPROGESTERONE ACETATE |
| TRITON X | CYCLOHEXIMIDE |
| DICHLON | LEFLUNOMIDE |
| AZINPHOS-ETHYL | PENTACHLOROPHENOL |
| CHEMBL220087 | RETINOL |
| TEBUFENOZIDE | TRETINOIN |
| CARBOQUONE | EPIGALOCATECHIN GALLATE |
| CHEMBL529918 | CHRYSIN |
| INDIUM CHLORIDE | CHLORANIL |
| ANTIMYCIN A | 2-METHOXYESTRADIOL |
| LEAD DIACETATE TRIHYDRATE | CHEMBL297304 |
| CHEMBL320361 | PYROGALLOL |
| ROCAGLAMIDE | HARMINE |
| CHLORMIDAZOLE | BUMETANIDE |
| CINOBUFOTALIN | HELENALIN |
| AMCINAFIDE | BENZETHONIUM CHLORIDE |
| CHEMBL582030 | METHYLPREDNISOLONE |
| PROCHLORAZ | PAPAVERINE |
| CALCIPOTRIENE | DOCEBENONE |
| CLOCORTOLONE PIVALATE | BROMOCRIPTINE |
| BUTYLPARABEN | T091317 |
| WHILE OLIVETOL | PHENAZOPYRIDINE HYDROCHLORIDE |
| CLORGYLINE HYDROCHLORIDE | SORAFENIB TOSYLATE |
| BENZO[E]PYRENE | ROSIGLITAZONE |
| CYCLOASPEPTIDE A | A-443654 |
| CHEMBL156959 | ACRIFLAVINE |
| TRIAMCINOLONE ACETONIDE | ZAFIRLUKAST |
| ROSIGLITAZONE MALEATE | PHENOTHIAZINE |
| NITRILOTRIACETIC ACID | HYDROQUINONE |
| INDIGO | DIACEREIN |
| TIBOLONE | RABEPRAZOLE SODIUM |
| GITOXIN | NISOLDIPINE |
| HYDROCORTISONE BUTYRATE | KAEMPFEROL |
| HYDROCORTISONE VALERATE | LIPOIC ACID, ALPHA |
| CHEMBL1873684 | SPIPERONE |
| 2,4-HEXADIENAL | CLIOQUINOL |
| PREDNISOLONE ACETATE | CHEMBL2095095 |
| THIOPHANATE METHYL | AMLEXANOX |
| METHACHOLINE CHLORIDE | TOLONIUM CHLORIDE |
| MONOBENZONE | CHEMBL299853 |
| PIOGLITAZONE HYDROCHLORIDE | DIGITOXIN |
| BENZOFURAN | ANISOMYCIN |
| ACTINONIN | TPCK |
| PHENAZINE-1-CARBOXYLIC ACID | CHEMBL19954 |
| CHEMBL1990783 | DICHLOROPHEN |
| ORYZALIN | TRIAMTERENE |
| DIFLORASONE DIACETATE | PHLORETIN |
| CHEMBL591178 | FENTICLOR |
| IPCONAZOLE | FLUMAZENIL |
| CHEMBL1481509 | MELPHALAN |
| CYCLOFENIL | CALCIMYCIN |
| YANGONIN | CEPHALOCHROMIN |
| ALACHLOR | MIFEPRISTONE |
| CHEMBL224318 | STREPTONIGRIN |
| STANOZOLOL | VANOXERINE |
| CHEMBL598903 | PHENANTHROLINE |
| MELENGESTROL ACETATE | FLUDARABINE |
| TOSUFLOXACIN TOSYLATE | HYCANTHONE |
| FIPEXIDE HYDROCHLORIDE | MERCURIC CHLORIDE |
| FLUORODIFEN | PHENYLMERCURIC ACETATE |
| ACROLEIN | TYRPHOSTIN A9 |
| CHEMBL600334 | CHEMBL576409 |
| BIFENAZATE | EFAVIRENZ |
| BRONOPOL | INDOMETHACIN |
| HYDROCORTISONE SODIUM SUCCINATE | CLADRIBINE |
| DICHLORODIPHENYLDICHLOROETHYLENE | PRAZEPAM |
| KRESOXIM-METHYL | CATECHOL |
| CHLORPYRIFOS-METHYL | TRIAMCINOLONE |
| TRIPROLIDINE HYDROCHLORIDE | SAPANISERTIB |
| METOPRINE | DAIDZEIN |
| BIOALLETHRIN S-CYCLOPENTENYL ISOMER | THIRAM |
| DANTHRON | LITHIUM |
| CHEMBL42355 | METHYLTHIONINIUM CHLORIDE |
| DROMETRIZOLE | CHEMBL585591 |
| CHEMBL601970 | CHEMBL601757 |
| CHEMBL530499 | ACAMPROSATE CALCIUM |
| CHEMBL1329443 | RHEIN |
| PERUVOSIDE | PREDNISOLONE |
| TRIFLOXYSTROBIN | AZATHIOPRINE |
| SULFORAPHANE | NOCODAZOLE |
| PYRAZOLE | THIOGUANINE |
| CHEMBL460273 | 9,10-PHENANTHRENEQUINONE |
| NALED | LANSOPRAZOLE |
| CHEMBL590184 | KETOCONAZOLE |
| MEGESTROL ACETATE | SIMVASTATIN |
| ETODOLAC | 4-CHLOROMERCURIBENZOIC ACID |
| TUBERCIDIN | APIGENIN |
| PREDNICARBATE | STAUROSPORINE |
| ENNIATIN B | EMODIN |
| ANGUIDIN | NICLOSAMIDE |
| CHEMBL601933 | LIOTHYRONINE SODIUM |
| CHEMBL199592 | SIROLIMUS |
| CHEMBL261692 | DEXAMETHASONE |
| CHEMBL580918 | CHEMBL578512 |
| ENDRIN | MENADIONE |
| PROPICONAZOLE | LINOLENIC ACID |
| DIGOXIGENIN | HOMIDIUM BROMIDE |
| SUFENTANIL CITRATE | EPINEPHRINE |
| CHEMBL70582 | DOPAMINE |
| GUANFACINE HYDROCHLORIDE | ELLIPTECINE |
| CHEMBL77675 | DIGOXIN |
| DINOSEB | OMEPRAZOLE |
| DICYCLOHEXYLCARBODIIMIDE | AZACITIDINE |
| DIMETHYL YELLOW | DIETHYLSTILBESTROL |
| ALPHA-TERTHIENYL | TROGLITAZONE |
| IODOFORM | DOXORUBICIN HYDROCHLORIDE |
| CHEMBL591361 | CURCUMIN |
| CHEMBL127579 | CAMPTOTHECIN |
| HYDROXYPROGESTERONE CAPROATE | MERCAPTOPURINE |
| RESACTIN A | HYDROCORTISONE |
| IOBENGUANE | DISULFIRAM |
| ORTHOTOLIDINE | PHENYTOIN |
| CHEMBL1523215 | HEXACHLOROPHENE |
| 1-NAPHTHYLISOTHIOCYANATE | DACTOLISIB |
| CHEMBL600908 | ALSTERPAULLONE |
| DIBENZOYLMETHANE | VORINOSTAT |
| TRIBUTYLCHLOROSTANNANE | DOXORUBICIN |
| CHEMBL584883 | COLCHICINE |
| FLUOXASTROBIN | CHEMBL429095 |
| 2,4-DINITROPHENOL | CARFILZOMIB |
| CITRIC ACID | NIFEDIPINE |
| CHEMBL578929 | GENISTEIN |
| ALOE-EMODIN | RESVERATROL |
| CHEMBL275260 | CYCLOSPORINE |
| HALCINONIDE | CELECOXIB |
| KINETIN RIBOSIDE | ALCOHOL |
| LYCOPENE | PROGESTERONE |
| BUFOGENIN | BORTEZOMIB |
| 5,7-DIHYDROXY-4-METHYLCOUMARIN | METHOTREXATE |
| PHOSALONE | CISPLATIN |
| 3-METHYLCHOLANTHRENE |  |
